# Supplementary material for: Tuning thermomechanical properties of hydrogen-bonded materials by using a mixed cocrystal approach
Source: Royal Society of Chemistry journal article supplement (doi:10.1039/d5tc00576k), 2025-01-01
Supplement: d5tc00576k1.pdf [file d5tc00576k1.pdf]

## Supplementary Information

# Tuning thermomechanical properties of hydrogen-bonded materials by using a mixed cocrystal approach

Gary C. George III,<sup>a</sup> Liulei Ma,<sup>a</sup> Jack R. Gaffney,<sup>a</sup> Richard K. Brooks,<sup>b</sup> Daniel K. Unruh,<sup>c</sup>  
Ryan H. Groeneman,<sup>\*b</sup> and Kristin M. Hutchins<sup>\*a,d</sup>

<sup>a</sup> Department of Chemistry, University of Missouri, Columbia, Missouri 65211, United States. Email: kristin.hutchins@missouri.edu

<sup>b</sup> Department of Natural Science and Mathematics, Webster University, St. Louis, Missouri 63119, United States. Email: ryangroeneman19@webster.edu

<sup>c</sup> Office of the Vice President for Research, University of Iowa, Iowa City, Iowa, 52242, United States.

<sup>d</sup> MU Materials Science & Engineering Institute, University of Missouri, Columbia, Missouri, 65211, United States.

|                                                                    |         |
|--------------------------------------------------------------------|---------|
| 1. Materials, General Methods, and Synthesis of the Cocrystals     | S2-S4   |
| 2. X-ray Diffraction Information and Data Tables                   | S5-S13  |
| 3. Powder X-ray Diffraction Data                                   | S14-S15 |
| 4. NMR Spectra                                                     | S16-S17 |
| 5. Thermal Data (TGA and DSC)                                      | S18-S21 |
| 6. Optical Images of the Cocrystals                                | S22     |
| 7. Electrostatic Potential Energy Calculations                     | S23     |
| 8. Thermal Expansion Data and Intermolecular Interaction Distances | S24-S28 |
| 9. Additional Crystal Structure Images                             | S29-S30 |
| 10. Variation of the Unit Cell Parameters with Temperature         | S31-S32 |
| 11. References                                                     | S32     |

## 1. Materials, General Methods, and Synthesis of the Cocrystals

### Materials

4-stilbazole (SB) and the solvent ethanol (reagent grade) were both purchased from Sigma-Aldrich Chemical (St. Louis, MO, USA) and used as received. Additional ethanol (200 proof) was purchased from Decon Labs Inc. (King of Prussia, PA, USA). Sodium bicarbonate, sodium chloride, hexanes, dichloromethane (DCM), chloroform ( $\text{CHCl}_3$ ), and ethyl acetate were purchased from Fisher Scientific (Fair Lawn, NJ, USA). Resorcinol and bromine ( $\text{Br}_2$ ) were purchased from Alfa Aesar (Ward Hill, MA, USA). 4,6-Dibromoresorcinol (4,6-diBr res)<sup>1</sup> was synthesized by using a modified literature procedure. 4-(Phenylethynyl)pyridine (PAB)<sup>2</sup> and additional SB<sup>3</sup> were synthesized using literature procedures. All crystallizations were performed in 20 mL scintillation vials.

### General Methods

Thin-layer chromatography (TLC) was performed using ALUGRAM Xtra aluminum sheets coated with silica gel from MACHEREY-NAGEL Inc (Germany). Silica gel was purchased from SILICYCLE Inc. (Quebec, Canada). Column chromatography was carried out using silica gel (40-63  $\mu\text{m}$ ). Chemical shifts ( $\delta$ ) are reported in ppm relative to residual  $\text{CHCl}_3$  ( $^1\text{H}$ ,  $\delta$  7.26). Nuclear magnetic resonance (NMR) spectra for synthesized compounds were collected using Bruker AMX-600 spectrometer at ambient probe temperature, unless otherwise noted. Data for  $^1\text{H}$  NMR spectra are reported as follows: chemical shift, multiplicity (s = singlet, d = doublet, t = triplet, m = multiplet), coupling constant ( $J$ , Hz), and integration. Deuterated chloroform for NMR spectroscopy was purchased from Cambridge Isotope Laboratories.

$^1\text{H}$  NMR spectra for the cocrystals were collected using a Bruker Avance III 500 MHz spectrometer using  $\text{DMSO}-d_6$  as a solvent. Powder X-ray diffraction (PXRD) data was collected at room temperature on a Rigaku Miniflex 6G benchtop powder diffractometer using  $\text{Cu K}\alpha$  radiation ( $\lambda = 1.54059 \text{ \AA}$ ) with an anode voltage of 40 kV, a current of 15 mA, in Bragg-Brentano beam geometry. Diffraction intensities were recorded on a D/teX Ultra position sensitive detector and samples were prepared on zero background holders. The patterns were obtained by scanning a  $2\theta$  range between  $5^\circ$  to  $50^\circ$  with a step size of  $0.02^\circ$ , and a scan time of 5 degrees/min.

TGA was performed on a TA Instruments TGA Q50 operating under a nitrogen atmosphere (40 mL/min) with a platinum pan. Crystal samples were run at a rate of 10 °C/min by heating from room temperature to 400 °C. DSC experiments were conducted using a TA Instruments DSC250 equipped with a RCS 90 refrigerated cooling system and under a nitrogen atmosphere. The flow rate was 50 mL/min, and the heating rate was 10°C/min. The samples were placed in TA zero pans, enclosed using a TA zero Hermetic lid, and crimped using a press. The thermograms were processed using the Trios software. For the DSC experiments, (4,6-diBr res)·2(SB) was heated from room temperature to 160 °C at a rate of 10 °C/min, then isothermally held at 160 °C for 1 min, and cooled back to room temperature at a rate of 10 °C/min. For (4,6-diBr res)·2(PAB) and (4,6-diBr res)·(SB)·(PAB) the samples were heated from room temperature to 150 °C at a rate of 10 °C/min, then isothermally held at 150 °C for 1 min, and cooled back to room temperature at a rate of 10 °C/min. The cutoff temperatures for DSC were chosen to avoid decomposition.

### Synthesis of 4,6-diBr res<sup>1</sup>

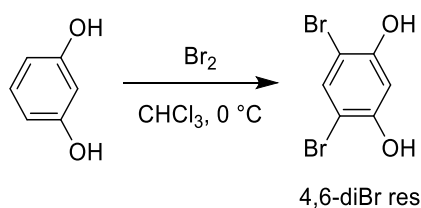

Resorcinol (1.1 g, 10 mmol) and 40 mL of CHCl<sub>3</sub> were added into a 250 mL round bottom flask and placed in an ice bath. A solution of Br<sub>2</sub> (3.2 g, 20 mmol) in 20 mL of CHCl<sub>3</sub> was added into the flask dropwise. The mixture was stirred at 0 °C for ~1h, then a saturated NaHCO<sub>3</sub> solution was added slowly to quench the reaction and remove the excess Br<sub>2</sub>. The reaction mixture was washed with brine and water. Then, CHCl<sub>3</sub> was removed by distillation under reduced pressure, and the crude product was purified by silica gel column chromatography (hexanes/dichloromethane/ethyl acetate=10:2:1 to 2:2:1, v/v/v). The product **4,6-diBr res** was afforded as a white solid (1.79 g, 66.8% yield). <sup>1</sup>H NMR (600 MHz, CDCl<sub>3</sub>) δ 7.55 (s, 1H), 6.76 (s, 1H), 5.52 (s, 2H).

### Crystallization details

All crystallization experiments were conducted at ambient temperature and humidity. After dissolving the components as detailed below, the vials were left at room temperature, and the solvent was allowed to slowly evaporate.

### **Crystallization of (4,6-diBr res)·2(SB)**

Cocrystals of (4,6-diBr res)·2(SB) were synthesized by dissolving 50.0 mg of SB in 2 mL of ethanol that was then combined with a 2 mL ethanol solution containing 36.9 mg of 4,6-diBr res (2:1 molar ratio). The cap was removed, and the vial was placed on the benchtop to allow slow evaporation. Single crystals suitable for X-ray diffraction were obtained within 2 days. When allowed to evaporate to dryness, a small amount excess SB was observed.

### **Crystallization of (4,6-diBr res)·2(PAB)**

Cocrystals of (4,6-diBr res)·2(PAB) were synthesized by dissolving 50.0 mg of PAB in 2 mL of ethanol that was then combined with a 2 mL ethanol solution containing 37.3 mg of 4,6-diBr res (2:1 molar ratio). The cap was removed, and the vial was placed on the benchtop to allow slow evaporation. Single crystals suitable for X-ray diffraction were obtained within 2 days.

### **Crystallization of (4,6-diBr res)·(SB)·(PAB)**

Lastly, the mixed cocrystal (4,6-diBr res)·(SB)·(PAB) was synthesized by dissolving 25.0 mg of SB and 25.0 mg of PAB both in 2 mL of ethanol then combined with a 2 mL ethanol solution containing 37.1 mg of 4,6-diBr res (1:1:1 molar ratio). The cap was removed, and the vial was placed on the benchtop to allow slow evaporation. As before, single crystals suitable for X-ray diffraction were obtained within 2 days.

### **Additional mixed cocrystal experiments**

In general, mixed cocrystals have been synthesized using unequal ratios of isosteric components. The formation of additional mixed cocrystals at a ratio of 0.75:0.25 and 0.25:0.75 with respect to SB:PAB was also attempted. In particular, the 0.75:0.25 ratio of SB:PAB was attempted by dissolving 37.5 mg of SB, 12.5 mg of PAB, and 37.1 mg of 4,6-diBr res each in 2 mL of ethanol and then the solutions were combined. The 0.25:0.75 ratio of SB:PAB was attempted by dissolving 12.5 mg of SB, 37.5 mg of PAB, and 37.1 mg of 4,6-diBr res each in 2 mL of ethanol and the solutions were combined. The cap was removed, and the vial was placed on the benchtop to allow slow evaporation. In both cases, only binary cocrystals were identified by screening several crystals via single-crystal X-ray diffraction.

## 2. X-ray Diffraction Information and Data Tables

Data were collected on a Bruker D8 VENTURE DUO diffractometer equipped with a I $\mu$ S 3.0 microfocus source operated at 75 W (50 kV, 1.5 mA) to generate Mo K $\alpha$  radiation ( $\lambda = 0.71073$  Å) and a PHOTON III detector. Crystals were transferred from the vial and placed on a glass slide in type NVH immersion oil by Cargille. A Zeiss Stemi 305 microscope was used to identify a suitable specimen for X-ray diffraction from a representative sample of the material. The selected crystal and a small amount of the oil were collected on a MiTeGen 100-micron MicroLoop and transferred to the instrument where it was placed under a nitrogen stream (Oxford 800 series) at 290 K. The sample was optically centered with the aid of a video camera to ensure that no translations were observed as the crystal was rotated through all positions. A unit cell collection was then carried out. After it was determined that the unit cell was not present in the CCDC database a data collection strategy was calculated by *APEX5*.<sup>4</sup> The crystal was measured for size, morphology, and color. After the initial data collection, subsequent data collections were conducted after the temperature of the cold stream was reduced at a rate of 4 K/minute to the desired temperature. After data collection, the unit cell was re-determined using a subset of the full data collection. Intensity data were corrected for Lorentz, polarization, and background effects using the *APEX5*.<sup>4</sup> A numerical absorption correction was applied based on a Gaussian integration over a multifaceted crystal and followed by a semi-empirical correction for adsorption applied using *SADABS*.<sup>4</sup> The program *SHELXT*<sup>5</sup> was used for the initial structure solution and *SHELXL*<sup>6</sup> was used for refinement of the structure. Both programs were utilized within the OLEX2 software.<sup>7</sup> Hydrogen atoms bound to carbon and oxygen atoms were located in the difference Fourier map and were geometrically constrained using the appropriate AFIX commands.

### Special Refinement Details

For crystal structures (4,6-diBr res)·2(SB) and (4,6-diBr res)·(SB)·(PAB) there were disordered atom sites that were treated as split sites. Details are listed below for each structure and occupancies for the disordered sites at each temperature.

#### Refinement for (4,6-diBr res)·2(SB)

In this structure, one ethylene moiety (C12 and C13) was undergoing pedal motion, and these atoms were modeled as split sites (A and B). To help maintain reasonable bond length and

ADP values for the disordered sites, SIMU, RIGU, and free variable DFIX restraints were applied. The structural model of the 290 K data was then used as a starting point for the data collected at other temperatures. At a temperature of 230 K and below, there was no longer an indication of a disordered ethylene moiety, and it was removed from the model. For this structure, attempts to also include disorder of the phenyl ring (C14 < C19) did not produce stable split sites even with SIMU and RIGU restraints applied.

| Temperature (K) | Occupancy of A sites | Occupancy of B sites |
|-----------------|----------------------|----------------------|
| 290             | 0.95                 | 0.05                 |
| 270             | 0.96                 | 0.04                 |
| 250             | 0.98                 | 0.02                 |

#### **Refinement for (4,6-diBr res)·(SB)·(PAB)**

In this structure, 4-stilbazole and 4-(phenylethynyl)pyridine molecules occupy the same crystallographic space within the structure. In most cases, it is reasonable to discern the differences in the electron density between the ethylene and acetylene moieties. However, how those bridging moieties affect the location of the phenyl or pyridyl rings is more complicated and nuanced. In this particular case, the hydrogen bonding resorcinol molecule to the pyridyl rings forces a similar configuration regardless of the bridging moiety. For the phenyl rings, however, with the 290 K data, both rings were modeled as split sites with RIGU and SIMU restraints applied. After initial refinements, only the ring containing carbon atoms C14 < C19 maintained reasonable ring configurations and demonstrated reasonable split sites. For the phenyl ring containing carbon atoms C27 < C32, the refined split sites were not able to maintain reasonable split sites and were modeled as single sites. For the partial occupancies and disorder sites, RIGU, SIMU, and free variable DFIX restraints were applied. The structural model of the 290 K data was created first and then used as a starting point for the data collected at other temperatures.

| <b>Temperature (K)</b> | <b>Occupancy of<br/>acetylene<br/>(C12 &lt; C19)</b> | <b>Occupancy of<br/>ethylene<br/>(C12 &lt; C19)</b> | <b>Occupancy of<br/>acetylene<br/>(C25 &lt; C26)</b> | <b>Occupancy of<br/>ethylene<br/>(C25 &lt; C26)</b> |
|------------------------|------------------------------------------------------|-----------------------------------------------------|------------------------------------------------------|-----------------------------------------------------|
| 290                    | 0.40                                                 | 0.60                                                | 0.33                                                 | 0.67                                                |
| 270                    | 0.40                                                 | 0.60                                                | 0.34                                                 | 0.66                                                |
| 250                    | 0.40                                                 | 0.60                                                | 0.35                                                 | 0.65                                                |
| 230                    | 0.37                                                 | 0.63                                                | 0.34                                                 | 0.66                                                |
| 210                    | 0.37                                                 | 0.63                                                | 0.36                                                 | 0.64                                                |
| 190                    | 0.36                                                 | 0.64                                                | 0.33                                                 | 0.67                                                |

**Table S1.** X-ray data for (4,6-diBr res)·2(SB) at 290, 270, and 250 K.

|                                                                            |                                                                               |                                                                               |                                                                               |
|----------------------------------------------------------------------------|-------------------------------------------------------------------------------|-------------------------------------------------------------------------------|-------------------------------------------------------------------------------|
| compound formula                                                           | C <sub>32</sub> H <sub>26</sub> Br <sub>2</sub> N <sub>2</sub> O <sub>2</sub> | C <sub>32</sub> H <sub>26</sub> Br <sub>2</sub> N <sub>2</sub> O <sub>2</sub> | C <sub>32</sub> H <sub>26</sub> Br <sub>2</sub> N <sub>2</sub> O <sub>2</sub> |
| formula mass                                                               | 630.37                                                                        | 630.37                                                                        | 630.37                                                                        |
| crystal system                                                             | Triclinic                                                                     | Triclinic                                                                     | Triclinic                                                                     |
| space group                                                                | <i>P</i> $\bar{1}$                                                            | <i>P</i> $\bar{1}$                                                            | <i>P</i> $\bar{1}$                                                            |
| <i>a</i> /Å                                                                | 10.894(6)                                                                     | 10.859(4)                                                                     | 10.828(4)                                                                     |
| <i>b</i> /Å                                                                | 11.122(6)                                                                     | 11.115(4)                                                                     | 11.110(3)                                                                     |
| <i>c</i> /Å                                                                | 11.660(8)                                                                     | 11.650(5)                                                                     | 11.643(4)                                                                     |
| $\alpha$ /°                                                                | 92.486(11)                                                                    | 92.382(9)                                                                     | 92.267(11)                                                                    |
| $\beta$ /°                                                                 | 96.818(14)                                                                    | 96.791(11)                                                                    | 96.759(13)                                                                    |
| $\gamma$ /°                                                                | 91.889(13)                                                                    | 91.928(12)                                                                    | 91.968(11)                                                                    |
| <i>V</i> /Å <sup>3</sup>                                                   | 1400.5(14)                                                                    | 1394.0(9)                                                                     | 1388.8(8)                                                                     |
| $\rho_{calc}$ /g cm <sup>-3</sup>                                          | 1.495                                                                         | 1.502                                                                         | 1.507                                                                         |
| <i>T</i> /K                                                                | 290                                                                           | 270                                                                           | 250                                                                           |
| <i>Z</i>                                                                   | 2                                                                             | 2                                                                             | 2                                                                             |
| radiation type                                                             | MoK $\alpha$ ( $\lambda$ = 0.71073)                                           | MoK $\alpha$ ( $\lambda$ = 0.71073)                                           | MoK $\alpha$ ( $\lambda$ = 0.71073)                                           |
| absorption coefficient, $\mu$ /mm <sup>-1</sup>                            | 2.926                                                                         | 2.940                                                                         | 2.951                                                                         |
| crystal size/mm <sup>3</sup>                                               | 0.196 × 0.175 × 0.163                                                         | 0.196 × 0.175 × 0.163                                                         | 0.196 × 0.175 × 0.163                                                         |
| no. of reflections measured                                                | 46592                                                                         | 46402                                                                         | 46246                                                                         |
| no. of independent reflections                                             | 5673                                                                          | 5639                                                                          | 5618                                                                          |
| no. of reflection ( <i>I</i> > 2 $\sigma$ ( <i>I</i> ))                    | 4020                                                                          | 4131                                                                          | 4229                                                                          |
| <i>R</i> <sub>int</sub>                                                    | 0.0929                                                                        | 0.0886                                                                        | 0.0849                                                                        |
| <i>R</i> <sub>1</sub> ( <i>I</i> > 2 $\sigma$ ( <i>I</i> ))                | 0.0368                                                                        | 0.0330                                                                        | 0.0324                                                                        |
| w <i>R</i> ( <i>F</i> <sup>2</sup> ) ( <i>I</i> > 2 $\sigma$ ( <i>I</i> )) | 0.0695                                                                        | 0.0663                                                                        | 0.0668                                                                        |
| <i>R</i> <sub>1</sub> (all data)                                           | 0.0655                                                                        | 0.0566                                                                        | 0.0535                                                                        |
| w <i>R</i> ( <i>F</i> <sup>2</sup> ) (all data)                            | 0.0795                                                                        | 0.0745                                                                        | 0.0743                                                                        |
| Goodness-of-fit                                                            | 1.011                                                                         | 1.008                                                                         | 1.018                                                                         |
| CCDC deposition number                                                     | 2420438                                                                       | 2420439                                                                       | 2420440                                                                       |



**Table S2.** X-ray data for (4,6-diBr res)·2(SB) at 230, 210, and 190 K.

| compound formula                                                           | C <sub>32</sub> H <sub>26</sub> Br <sub>2</sub> N <sub>2</sub> O <sub>2</sub> | C <sub>32</sub> H <sub>26</sub> Br <sub>2</sub> N <sub>2</sub> O <sub>2</sub> | C <sub>32</sub> H <sub>26</sub> Br <sub>2</sub> N <sub>2</sub> O <sub>2</sub> |
|----------------------------------------------------------------------------|-------------------------------------------------------------------------------|-------------------------------------------------------------------------------|-------------------------------------------------------------------------------|
| formula mass                                                               | 630.37                                                                        | 630.37                                                                        | 630.37                                                                        |
| crystal system                                                             | Triclinic                                                                     | Triclinic                                                                     | Triclinic                                                                     |
| space group                                                                | <i>P</i> $\bar{1}$                                                            | <i>P</i> $\bar{1}$                                                            | <i>P</i> $\bar{1}$                                                            |
| <i>a</i> /Å                                                                | 10.797(5)                                                                     | 10.766(5)                                                                     | 10.741(5)                                                                     |
| <i>b</i> /Å                                                                | 11.105(5)                                                                     | 11.097(5)                                                                     | 11.091(5)                                                                     |
| <i>c</i> /Å                                                                | 11.636(7)                                                                     | 11.629(7)                                                                     | 11.623(6)                                                                     |
| $\alpha$ /°                                                                | 92.156(12)                                                                    | 92.048(11)                                                                    | 91.955(10)                                                                    |
| $\beta$ /°                                                                 | 96.727(11)                                                                    | 96.699(13)                                                                    | 96.665(12)                                                                    |
| $\gamma$ /°                                                                | 91.992(11)                                                                    | 92.013(11)                                                                    | 92.024(11)                                                                    |
| <i>V</i> /Å <sup>3</sup>                                                   | 1383.5(12)                                                                    | 1377.8(12)                                                                    | 1373.4(12)                                                                    |
| $\rho_{\text{calc}}$ /g cm <sup>-3</sup>                                   | 1.513                                                                         | 1.519                                                                         | 1.524                                                                         |
| <i>T</i> /K                                                                | 230                                                                           | 210                                                                           | 190                                                                           |
| <i>Z</i>                                                                   | 2                                                                             | 2                                                                             | 2                                                                             |
| radiation type                                                             | MoK $\alpha$ ( $\lambda$ = 0.71073)                                           | MoK $\alpha$ ( $\lambda$ = 0.71073)                                           | MoK $\alpha$ ( $\lambda$ = 0.71073)                                           |
| absorption coefficient, $\mu$ /mm <sup>-1</sup>                            | 2.962                                                                         | 2.974                                                                         | 2.984                                                                         |
| crystal size/mm <sup>3</sup>                                               | 0.196 × 0.175 × 0.163                                                         | 0.196 × 0.175 × 0.163                                                         | 0.196 × 0.175 × 0.163                                                         |
| no. of reflections measured                                                | 46047                                                                         | 45868                                                                         | 45706                                                                         |
| no. of independent reflections                                             | 5602                                                                          | 5578                                                                          | 5557                                                                          |
| no. of reflection ( <i>I</i> > 2 $\sigma$ ( <i>I</i> ))                    | 4325                                                                          | 4387                                                                          | 4459                                                                          |
| <i>R</i> <sub>int</sub>                                                    | 0.0833                                                                        | 0.0814                                                                        | 0.0787                                                                        |
| <i>R</i> <sub>1</sub> ( <i>I</i> > 2 $\sigma$ ( <i>I</i> ))                | 0.0317                                                                        | 0.0304                                                                        | 0.0299                                                                        |
| w <i>R</i> ( <i>F</i> <sup>2</sup> ) ( <i>I</i> > 2 $\sigma$ ( <i>I</i> )) | 0.0651                                                                        | 0.0619                                                                        | 0.0608                                                                        |
| <i>R</i> <sub>1</sub> (all data)                                           | 0.0499                                                                        | 0.0464                                                                        | 0.0442                                                                        |
| w <i>R</i> ( <i>F</i> <sup>2</sup> ) (all data)                            | 0.0714                                                                        | 0.0674                                                                        | 0.0656                                                                        |
| Goodness-of-fit                                                            | 1.021                                                                         | 1.022                                                                         | 1.018                                                                         |
| CCDC deposition number                                                     | 2420441                                                                       | 2420442                                                                       | 2420443                                                                       |

**Table S3.** X-ray data for (4,6-diBr res)·2(PAB) at 290, 270, and 250 K.

|                                                                            |                                                                               |                                                                               |                                                                               |
|----------------------------------------------------------------------------|-------------------------------------------------------------------------------|-------------------------------------------------------------------------------|-------------------------------------------------------------------------------|
| compound formula                                                           | C <sub>32</sub> H <sub>22</sub> Br <sub>2</sub> N <sub>2</sub> O <sub>2</sub> | C <sub>32</sub> H <sub>22</sub> Br <sub>2</sub> N <sub>2</sub> O <sub>2</sub> | C <sub>32</sub> H <sub>22</sub> Br <sub>2</sub> N <sub>2</sub> O <sub>2</sub> |
| formula mass                                                               | 626.33                                                                        | 626.33                                                                        | 626.33                                                                        |
| crystal system                                                             | Monoclinic                                                                    | Monoclinic                                                                    | Monoclinic                                                                    |
| space group                                                                | <i>P</i> 2 <sub>1</sub> / <i>c</i>                                            | <i>P</i> 2 <sub>1</sub> / <i>c</i>                                            | <i>P</i> 2 <sub>1</sub> / <i>c</i>                                            |
| <i>a</i> /Å                                                                | 13.7221(13)                                                                   | 13.7170(12)                                                                   | 13.7103(12)                                                                   |
| <i>b</i> /Å                                                                | 19.6785(19)                                                                   | 19.6387(18)                                                                   | 19.5964(17)                                                                   |
| <i>c</i> /Å                                                                | 10.7022(9)                                                                    | 10.6868(8)                                                                    | 10.6712(8)                                                                    |
| $\alpha$ /°                                                                | 90                                                                            | 90                                                                            | 90                                                                            |
| $\beta$ /°                                                                 | 102.145(2)                                                                    | 102.276(2)                                                                    | 102.412(2)                                                                    |
| $\gamma$ /°                                                                | 90                                                                            | 90                                                                            | 90                                                                            |
| <i>V</i> /Å <sup>3</sup>                                                   | 2825.2(5)                                                                     | 2813.0(4)                                                                     | 2800.0(4)                                                                     |
| $\rho_{\text{calc}}$ /g cm <sup>-3</sup>                                   | 1.473                                                                         | 1.479                                                                         | 1.486                                                                         |
| <i>T</i> /K                                                                | 290                                                                           | 270                                                                           | 250                                                                           |
| <i>Z</i>                                                                   | 4                                                                             | 4                                                                             | 4                                                                             |
| radiation type                                                             | MoK $\alpha$ ( $\lambda$ = 0.71073)                                           | MoK $\alpha$ ( $\lambda$ = 0.71073)                                           | MoK $\alpha$ ( $\lambda$ = 0.71073)                                           |
| absorption coefficient, $\mu$ /mm <sup>-1</sup>                            | 2.900                                                                         | 2.913                                                                         | 2.927                                                                         |
| crystal size/mm <sup>3</sup>                                               | 0.147 × 0.14 × 0.137                                                          | 0.147 × 0.14 × 0.137                                                          | 0.147 × 0.14 × 0.137                                                          |
| no. of reflections measured                                                | 45582                                                                         | 45254                                                                         | 45009                                                                         |
| no. of independent reflections                                             | 5357                                                                          | 5338                                                                          | 5311                                                                          |
| no. of reflection ( <i>I</i> > 2 $\sigma$ ( <i>I</i> ))                    | 3492                                                                          | 3611                                                                          | 3726                                                                          |
| <i>R</i> <sub>int</sub>                                                    | 0.0763                                                                        | 0.0769                                                                        | 0.0752                                                                        |
| <i>R</i> <sub>1</sub> ( <i>I</i> > 2 $\sigma$ ( <i>I</i> ))                | 0.0370                                                                        | 0.0357                                                                        | 0.0348                                                                        |
| w <i>R</i> ( <i>F</i> <sup>2</sup> ) ( <i>I</i> > 2 $\sigma$ ( <i>I</i> )) | 0.0631                                                                        | 0.0622                                                                        | 0.0643                                                                        |
| <i>R</i> <sub>1</sub> (all data)                                           | 0.0741                                                                        | 0.0687                                                                        | 0.0646                                                                        |
| w <i>R</i> ( <i>F</i> <sup>2</sup> ) (all data)                            | 0.0737                                                                        | 0.0717                                                                        | 0.0734                                                                        |
| Goodness-of-fit                                                            | 1.003                                                                         | 0.998                                                                         | 1.011                                                                         |
| CCDC deposition number                                                     | 2420444                                                                       | 2420445                                                                       | 2420446                                                                       |

**Table S4.** X-ray data for (4,6-diBr res)·2(PAB) at 230, 210, and 190 K.

| compound formula                                                           | C <sub>32</sub> H <sub>22</sub> Br <sub>2</sub> N <sub>2</sub> O <sub>2</sub> | C <sub>32</sub> H <sub>22</sub> Br <sub>2</sub> N <sub>2</sub> O <sub>2</sub> | C <sub>32</sub> H <sub>22</sub> Br <sub>2</sub> N <sub>2</sub> O <sub>2</sub> |
|----------------------------------------------------------------------------|-------------------------------------------------------------------------------|-------------------------------------------------------------------------------|-------------------------------------------------------------------------------|
| formula mass                                                               | 626.33                                                                        | 626.33                                                                        | 626.33                                                                        |
| crystal system                                                             | Monoclinic                                                                    | Monoclinic                                                                    | Monoclinic                                                                    |
| space group                                                                | <i>P</i> 2 <sub>1</sub> / <i>c</i>                                            | <i>P</i> 2 <sub>1</sub> / <i>c</i>                                            | <i>P</i> 2 <sub>1</sub> / <i>c</i>                                            |
| <i>a</i> /Å                                                                | 13.7063(11)                                                                   | 13.6982(11)                                                                   | 13.6922(10)                                                                   |
| <i>b</i> /Å                                                                | 19.5596(17)                                                                   | 19.5139(16)                                                                   | 19.4698(15)                                                                   |
| <i>c</i> /Å                                                                | 10.6580(8)                                                                    | 10.6429(7)                                                                    | 10.6293(7)                                                                    |
| $\alpha$ /°                                                                | 90                                                                            | 90                                                                            | 90                                                                            |
| $\beta$ /°                                                                 | 102.548(2)                                                                    | 102.668(2)                                                                    | 102.781(2)                                                                    |
| $\gamma$ /°                                                                | 90                                                                            | 90                                                                            | 90                                                                            |
| <i>V</i> /Å <sup>3</sup>                                                   | 2789.1(4)                                                                     | 2775.7(4)                                                                     | 2763.4(3)                                                                     |
| $\rho_{\text{calc}}$ /g cm <sup>-3</sup>                                   | 1.492                                                                         | 1.499                                                                         | 1.505                                                                         |
| <i>T</i> /K                                                                | 230                                                                           | 210                                                                           | 190                                                                           |
| <i>Z</i>                                                                   | 4                                                                             | 4                                                                             | 4                                                                             |
| radiation type                                                             | MoK $\alpha$ ( $\lambda$ = 0.71073)                                           | MoK $\alpha$ ( $\lambda$ = 0.71073)                                           | MoK $\alpha$ ( $\lambda$ = 0.71073)                                           |
| absorption coefficient, $\mu$ /mm <sup>-1</sup>                            | 2.938                                                                         | 2.952                                                                         | 2.965                                                                         |
| crystal size/mm <sup>3</sup>                                               | 0.147 × 0.14 × 0.137                                                          | 0.147 × 0.14 × 0.137                                                          | 0.147 × 0.14 × 0.137                                                          |
| no. of reflections measured                                                | 44849                                                                         | 44677                                                                         | 44512                                                                         |
| no. of independent reflections                                             | 5288                                                                          | 5262                                                                          | 5242                                                                          |
| no. of reflection ( <i>I</i> > 2 $\sigma$ ( <i>I</i> ))                    | 3829                                                                          | 3937                                                                          | 3982                                                                          |
| <i>R</i> <sub>int</sub>                                                    | 0.0734                                                                        | 0.0745                                                                        | 0.0732                                                                        |
| <i>R</i> <sub>1</sub> ( <i>I</i> > 2 $\sigma$ ( <i>I</i> ))                | 0.0341                                                                        | 0.0334                                                                        | 0.0321                                                                        |
| w <i>R</i> ( <i>F</i> <sup>2</sup> ) ( <i>I</i> > 2 $\sigma$ ( <i>I</i> )) | 0.0612                                                                        | 0.0596                                                                        | 0.0575                                                                        |
| <i>R</i> <sub>1</sub> (all data)                                           | 0.0600                                                                        | 0.0560                                                                        | 0.0533                                                                        |
| w <i>R</i> ( <i>F</i> <sup>2</sup> ) (all data)                            | 0.0689                                                                        | 0.0664                                                                        | 0.0639                                                                        |
| Goodness-of-fit                                                            | 1.019                                                                         | 1.036                                                                         | 1.035                                                                         |
| CCDC deposition number                                                     | 2420447                                                                       | 2420448                                                                       | 2420449                                                                       |

**Table S5.** X-ray data for (4,6-diBr res)·(SB)·(PAB) at 290, 270, and 250 K.

| compound formula                                                           | C <sub>32</sub> H <sub>24.55</sub> Br <sub>2</sub> N <sub>2</sub> O <sub>2</sub> | C <sub>32</sub> H <sub>24.52</sub> Br <sub>2</sub> N <sub>2</sub> O <sub>2</sub> | C <sub>32</sub> H <sub>24.53</sub> Br <sub>2</sub> N <sub>2</sub> O <sub>2</sub> |
|----------------------------------------------------------------------------|----------------------------------------------------------------------------------|----------------------------------------------------------------------------------|----------------------------------------------------------------------------------|
| formula mass                                                               | 628.90                                                                           | 628.87                                                                           | 628.88                                                                           |
| crystal system                                                             | Triclinic                                                                        | Triclinic                                                                        | Triclinic                                                                        |
| space group                                                                | <i>P</i> $\bar{1}$                                                               | <i>P</i> $\bar{1}$                                                               | <i>P</i> $\bar{1}$                                                               |
| <i>a</i> /Å                                                                | 10.9453(7)                                                                       | 10.9159(6)                                                                       | 10.8860(6)                                                                       |
| <i>b</i> /Å                                                                | 11.0670(6)                                                                       | 11.0588(6)                                                                       | 11.0501(5)                                                                       |
| <i>c</i> /Å                                                                | 11.7158(7)                                                                       | 11.7098(7)                                                                       | 11.7037(7)                                                                       |
| $\alpha$ /°                                                                | 92.186(2)                                                                        | 92.098(2)                                                                        | 91.998(2)                                                                        |
| $\beta$ /°                                                                 | 97.370(2)                                                                        | 97.391(2)                                                                        | 97.416(2)                                                                        |
| $\gamma$ /°                                                                | 91.752(2)                                                                        | 91.784(2)                                                                        | 91.813(2)                                                                        |
| <i>V</i> /Å <sup>3</sup>                                                   | 1405.50(14)                                                                      | 1399.97(14)                                                                      | 1394.30(13)                                                                      |
| $\rho_{\text{calc}}$ /g cm <sup>-3</sup>                                   | 1.486                                                                            | 1.492                                                                            | 1.498                                                                            |
| <i>T</i> /K                                                                | 290                                                                              | 270                                                                              | 250                                                                              |
| <i>Z</i>                                                                   | 2                                                                                | 2                                                                                | 2                                                                                |
| radiation type                                                             | MoK $\alpha$ ( $\lambda$ = 0.71073)                                              | MoK $\alpha$ ( $\lambda$ = 0.71073)                                              | MoK $\alpha$ ( $\lambda$ = 0.71073)                                              |
| absorption coefficient, $\mu$ /mm <sup>-1</sup>                            | 2.915                                                                            | 2.927                                                                            | 2.939                                                                            |
| crystal size/mm <sup>3</sup>                                               | 0.318 × 0.255 × 0.155                                                            | 0.318 × 0.255 × 0.155                                                            | 0.318 × 0.255 × 0.155                                                            |
| no. of reflections measured                                                | 41640                                                                            | 41458                                                                            | 50027                                                                            |
| no. of independent reflections                                             | 5250                                                                             | 5222                                                                             | 6848                                                                             |
| no. of reflection ( <i>I</i> > 2 $\sigma$ ( <i>I</i> ))                    | 3898                                                                             | 4037                                                                             | 4819                                                                             |
| <i>R</i> <sub>int</sub>                                                    | 0.0740                                                                           | 0.0698                                                                           | 0.0772                                                                           |
| <i>R</i> <sub>1</sub> ( <i>I</i> > 2 $\sigma$ ( <i>I</i> ))                | 0.0346                                                                           | 0.0341                                                                           | 0.0362                                                                           |
| w <i>R</i> ( <i>F</i> <sup>2</sup> ) ( <i>I</i> > 2 $\sigma$ ( <i>I</i> )) | 0.0741                                                                           | 0.0721                                                                           | 0.0770                                                                           |
| <i>R</i> <sub>1</sub> (all data)                                           | 0.0568                                                                           | 0.0519                                                                           | 0.0650                                                                           |
| w <i>R</i> ( <i>F</i> <sup>2</sup> ) (all data)                            | 0.0830                                                                           | 0.0794                                                                           | 0.870                                                                            |
| Goodness-of-fit                                                            | 1.010                                                                            | 1.017                                                                            | 1.020                                                                            |
| CCDC deposition number                                                     | 2420450                                                                          | 2420451                                                                          | 2420452                                                                          |

**Table S6.** X-ray data for (4,6-diBr res)·(SB)·(PAB) at 230, 210, and 190 K.

| compound formula                                                           | C <sub>32</sub> H <sub>24.57</sub> Br <sub>2</sub> N <sub>2</sub> O <sub>2</sub> | C <sub>32</sub> H <sub>24.54</sub> Br <sub>2</sub> N <sub>2</sub> O <sub>2</sub> | C <sub>32</sub> H <sub>24.63</sub> Br <sub>2</sub> N <sub>2</sub> O <sub>2</sub> |
|----------------------------------------------------------------------------|----------------------------------------------------------------------------------|----------------------------------------------------------------------------------|----------------------------------------------------------------------------------|
| formula mass                                                               | 628.93                                                                           | 628.89                                                                           | 628.99                                                                           |
| crystal system                                                             | Triclinic                                                                        | Triclinic                                                                        | Triclinic                                                                        |
| space group                                                                | <i>P</i> $\bar{1}$                                                               | <i>P</i> $\bar{1}$                                                               | <i>P</i> $\bar{1}$                                                               |
| <i>a</i> /Å                                                                | 10.8565(6)                                                                       | 10.8319(5)                                                                       | 10.8084(5)                                                                       |
| <i>b</i> /Å                                                                | 11.0401(5)                                                                       | 11.0319(5)                                                                       | 11.0217(4)                                                                       |
| <i>c</i> /Å                                                                | 11.6972(6)                                                                       | 11.6933(6)                                                                       | 11.6874(6)                                                                       |
| $\alpha$ /°                                                                | 91.8880(10)                                                                      | 91.7910(10)                                                                      | 91.6890(10)                                                                      |
| $\beta$ /°                                                                 | 97.441(2)                                                                        | 97.468(2)                                                                        | 97.496(2)                                                                        |
| $\gamma$ /°                                                                | 91.8380(10)                                                                      | 91.8610(10)                                                                      | 91.8790(10)                                                                      |
| <i>V</i> /Å <sup>3</sup>                                                   | 1388.49(12)                                                                      | 1383.84(11)                                                                      | 1378.84(11)                                                                      |
| $\rho_{\text{calc}}$ /g cm <sup>-3</sup>                                   | 1.504                                                                            | 1.509                                                                            | 1.515                                                                            |
| <i>T</i> /K                                                                | 230                                                                              | 210                                                                              | 190                                                                              |
| <i>Z</i>                                                                   | 2                                                                                | 2                                                                                | 2                                                                                |
| radiation type                                                             | MoK $\alpha$ ( $\lambda$ = 0.71073)                                              | MoK $\alpha$ ( $\lambda$ = 0.71073)                                              | MoK $\alpha$ ( $\lambda$ = 0.71073)                                              |
| absorption coefficient, $\mu$ /mm <sup>-1</sup>                            | 2.951                                                                            | 2.961                                                                            | 2.972                                                                            |
| crystal size/mm <sup>3</sup>                                               | 0.318 × 0.255 × 0.155                                                            | 0.318 × 0.255 × 0.155                                                            | 0.318 × 0.255 × 0.155                                                            |
| no. of reflections measured                                                | 43433                                                                            | 43206                                                                            | 45409                                                                            |
| no. of independent reflections                                             | 5576                                                                             | 5548                                                                             | 5965                                                                             |
| no. of reflection ( <i>I</i> > 2 $\sigma$ ( <i>I</i> ))                    | 4416                                                                             | 4532                                                                             | 4885                                                                             |
| <i>R</i> <sub>int</sub>                                                    | 0.0666                                                                           | 0.0640                                                                           | 0.0640                                                                           |
| <i>R</i> <sub>1</sub> ( <i>I</i> > 2 $\sigma$ ( <i>I</i> ))                | 0.0308                                                                           | 0.0298                                                                           | 0.0298                                                                           |
| w <i>R</i> ( <i>F</i> <sup>2</sup> ) ( <i>I</i> > 2 $\sigma$ ( <i>I</i> )) | 0.0680                                                                           | 0.0664                                                                           | 0.0644                                                                           |
| <i>R</i> <sub>1</sub> (all data)                                           | 0.0463                                                                           | 0.0426                                                                           | 0.0426                                                                           |
| w <i>R</i> ( <i>F</i> <sup>2</sup> ) (all data)                            | 0.0740                                                                           | 0.0715                                                                           | 0.0694                                                                           |
| Goodness-of-fit                                                            | 1.024                                                                            | 1.021                                                                            | 1.027                                                                            |
| CCDC deposition number                                                     | 2420453                                                                          | 2420454                                                                          | 2420455                                                                          |

### 3. Powder X-ray Diffraction Data

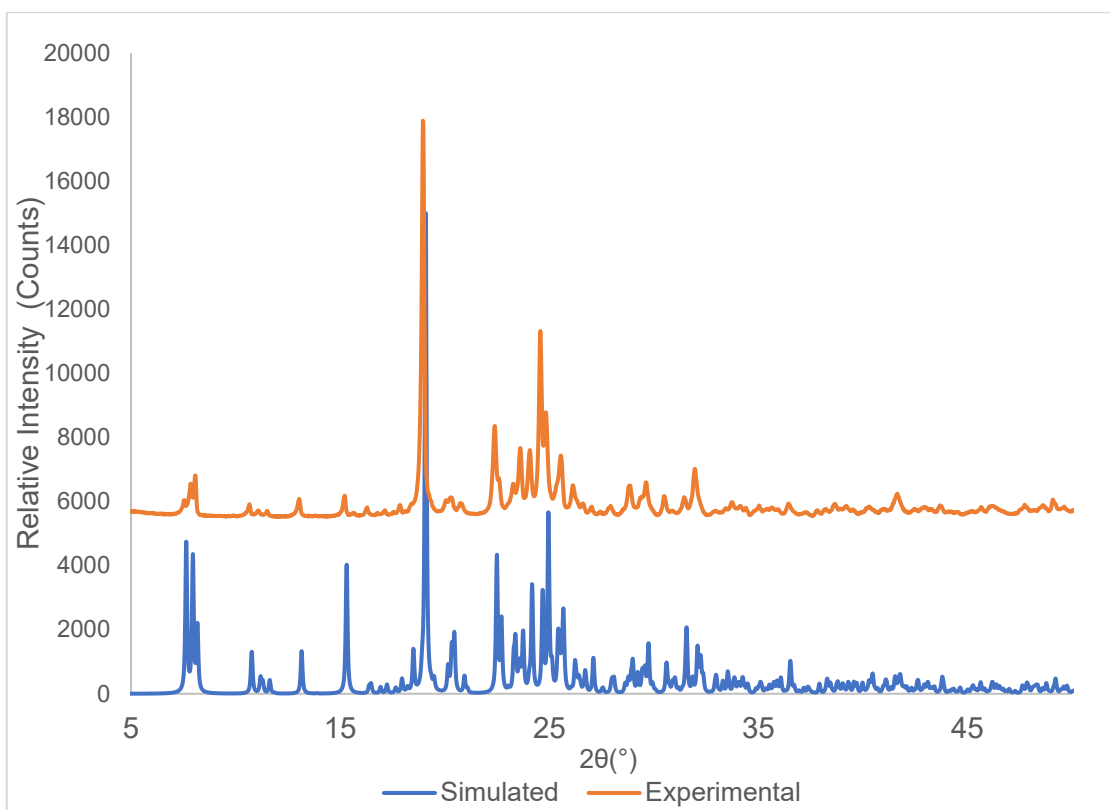

**Figure S1.** PXRD patterns of (4,6-diBr res)·2(SB) with simulated pattern from single-crystal X-ray data at 290 K and experimental pattern from bulk crystals grown by slow evaporation.

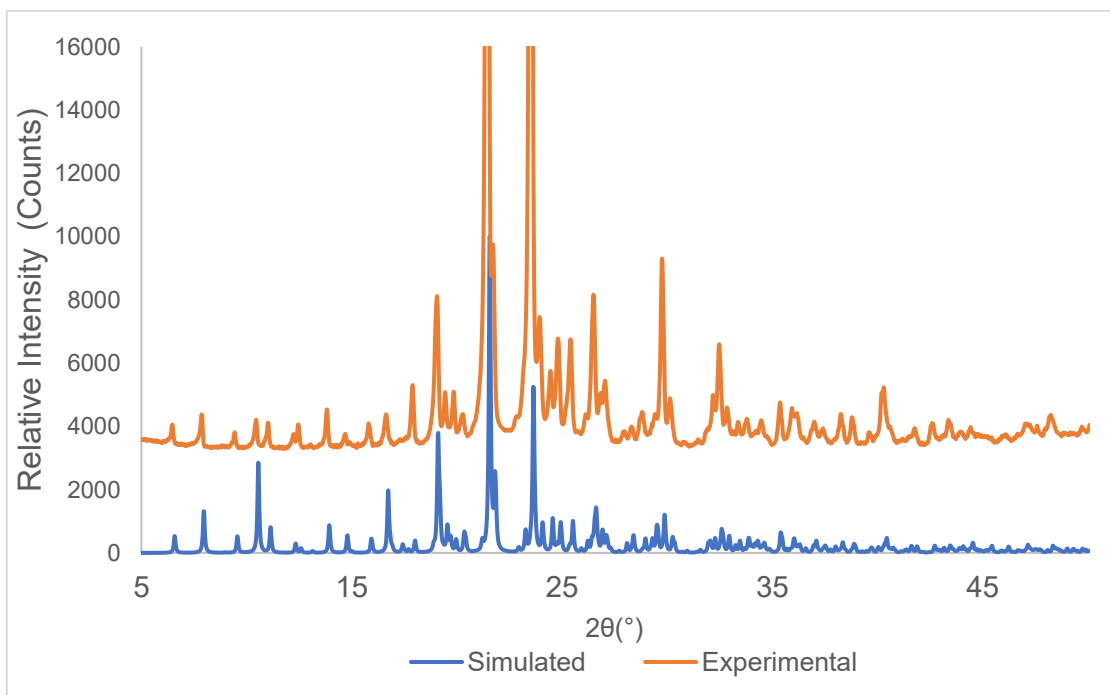

**Figure S2.** PXRD patterns of (4,6-diBr res)·2(PAB) with simulated pattern from single-crystal X-ray data at 290 K and experimental pattern from bulk crystals grown by slow evaporation.

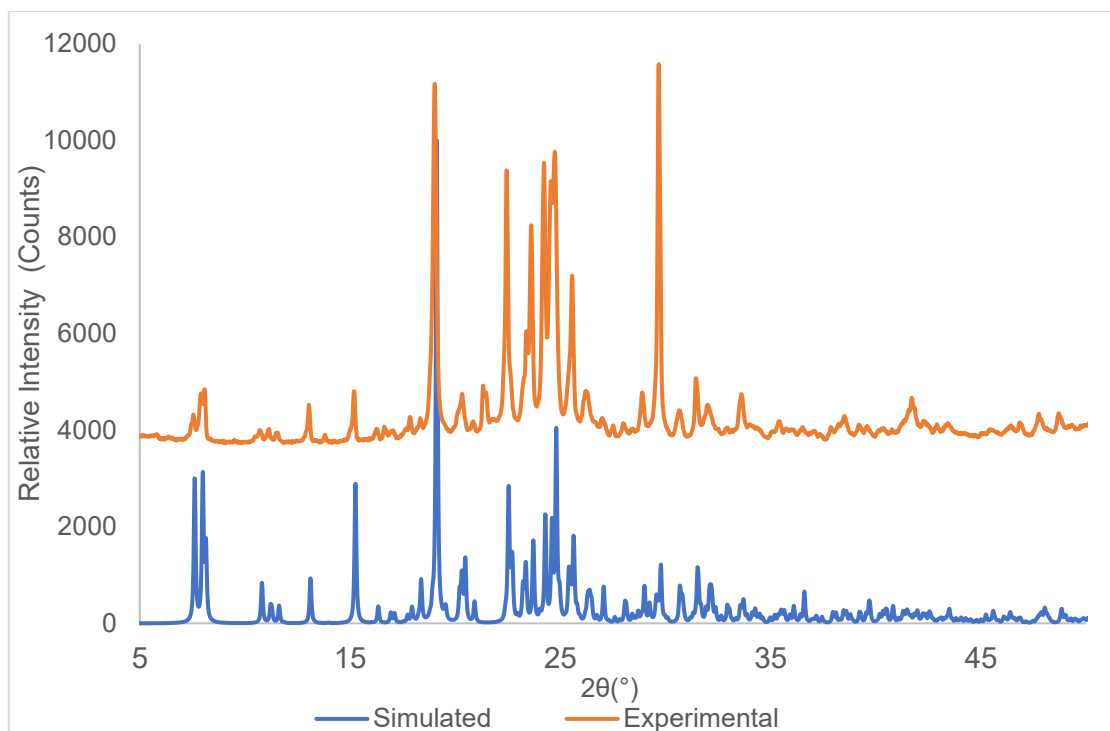

**Figure S3.** PXRD patterns of (4,6-diBr res)·(SB)·(PAB) with simulated pattern from single-crystal X-ray data at 290 K and experimental pattern from bulk crystals grown by slow evaporation.

## 4. NMR Spectra

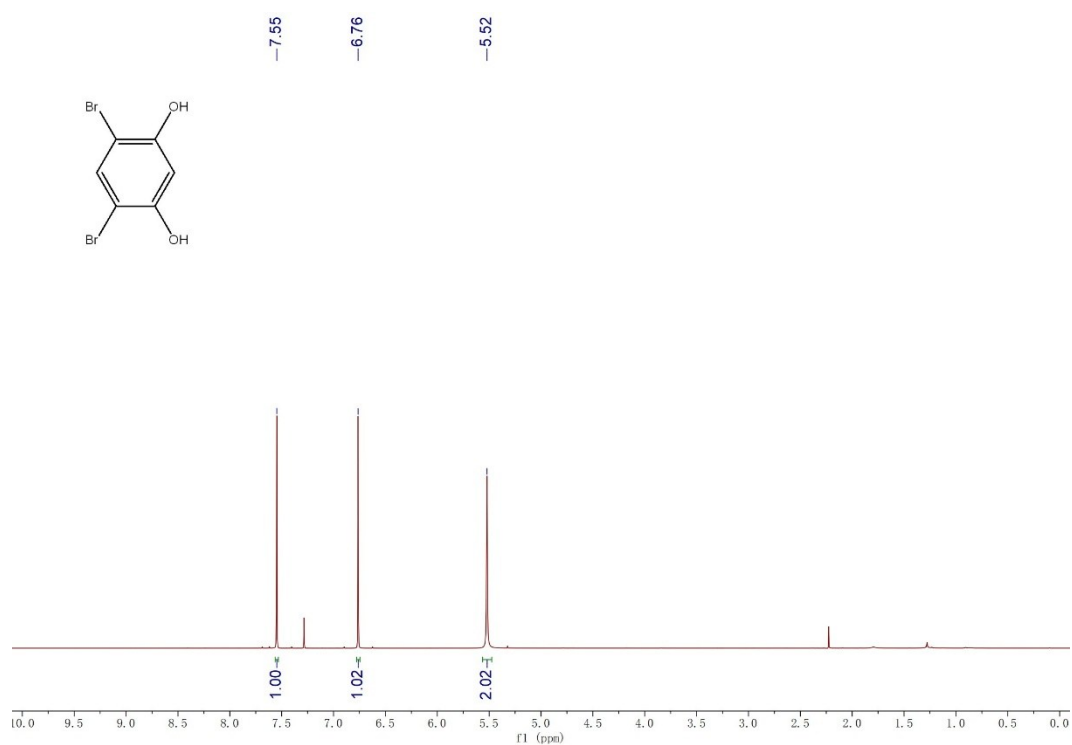

**Figure S4.** <sup>1</sup>H NMR spectrum of 4,6-diBr res.

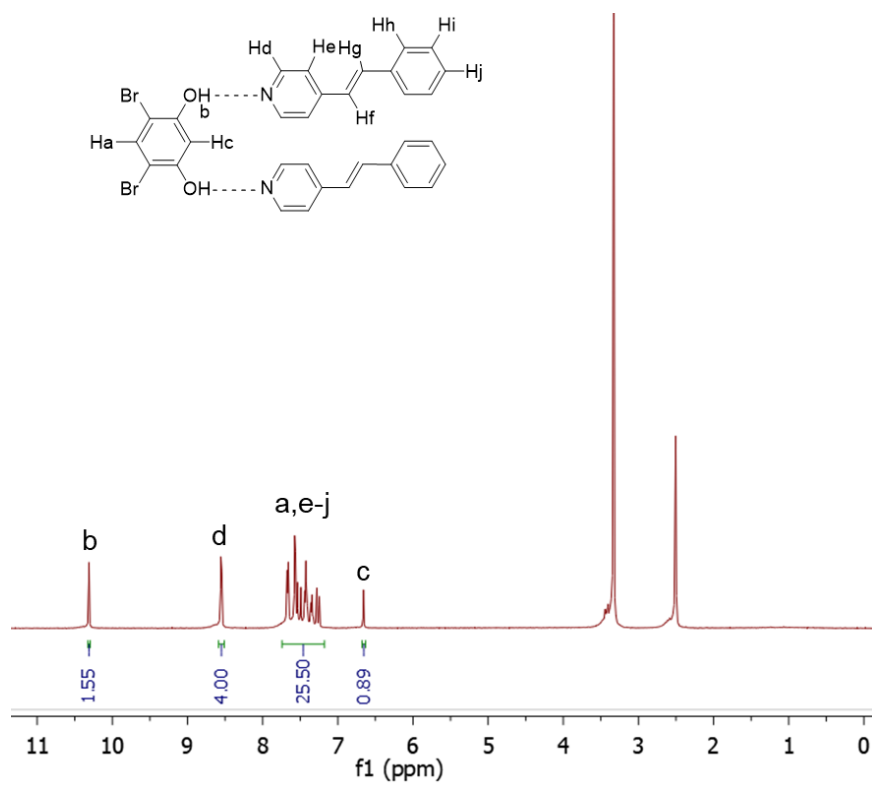

**Figure S5.** <sup>1</sup>H NMR spectrum of (4,6-diBr res)·2(SB).



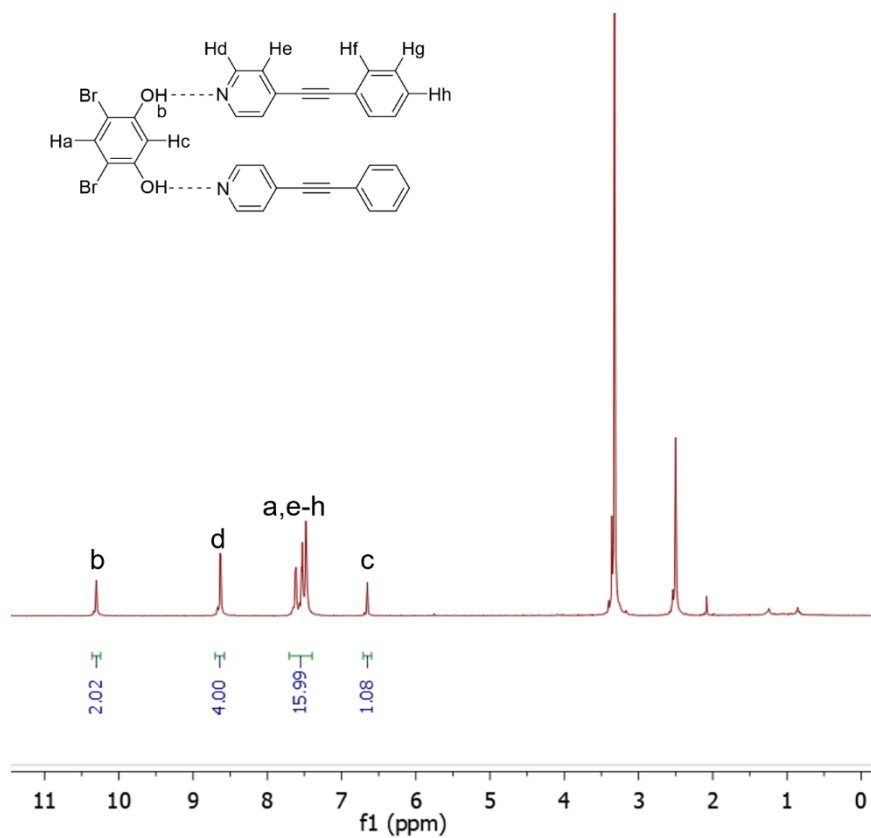

**Figure S6.**  $^1\text{H}$  NMR spectrum of (4,6-diBr res)·2(PAB).

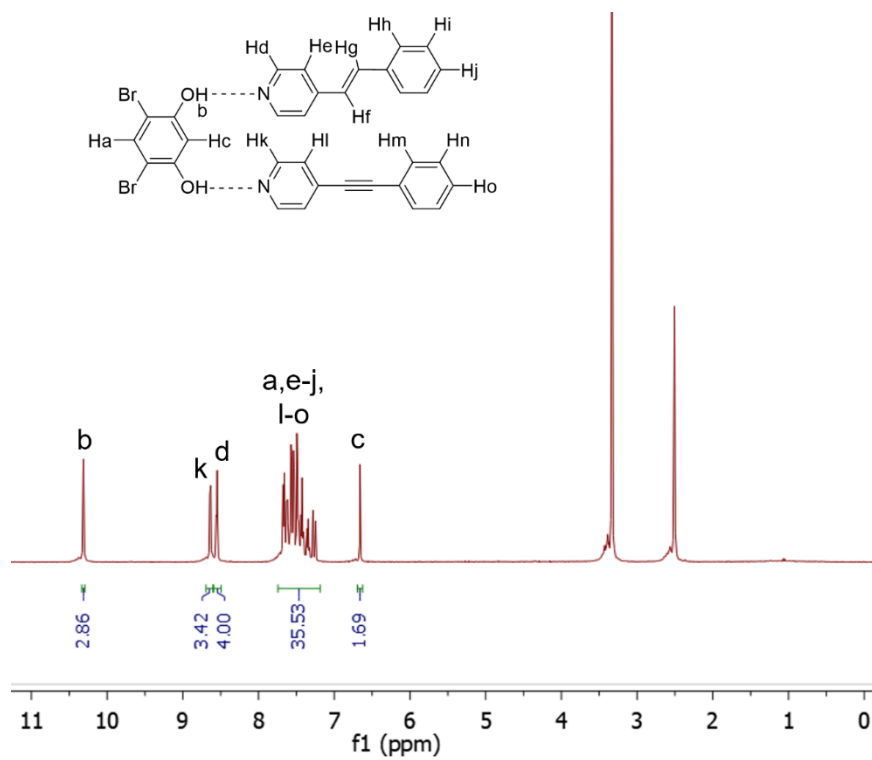

**Figure S7.**  $^1\text{H}$  NMR spectrum of (4,6-diBr res)·(SB)·(PAB).

## 5. Thermal Data (TGA and DSC)

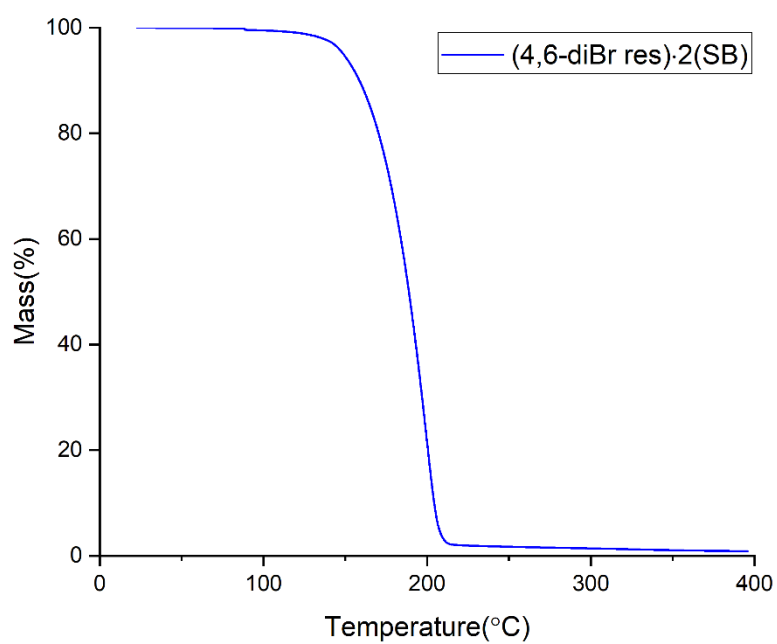

**Figure S8.** TGA curve of (4,6-diBr res)·2(SB). Decomposition began at ca. 174 °C.

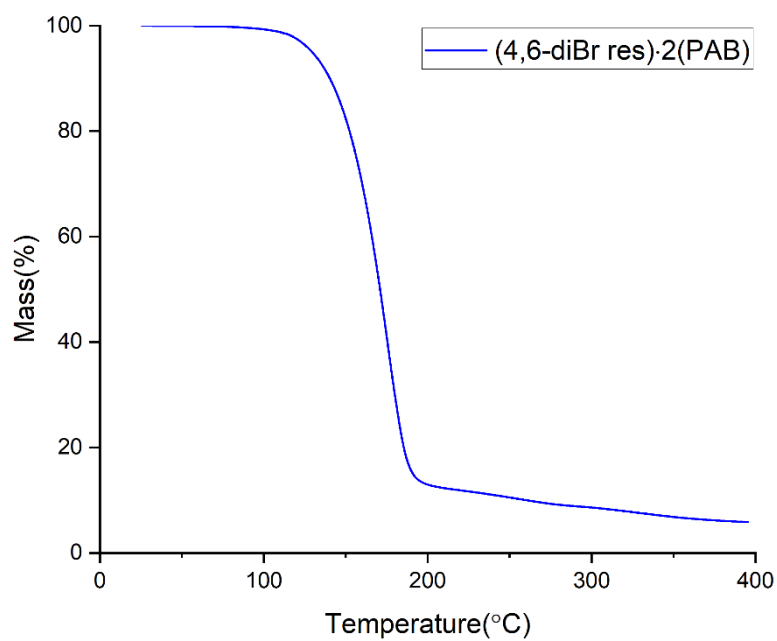

**Figure S9.** TGA curve of (4,6-diBr res)·2(PAB). Decomposition began at ca. 152 °C.

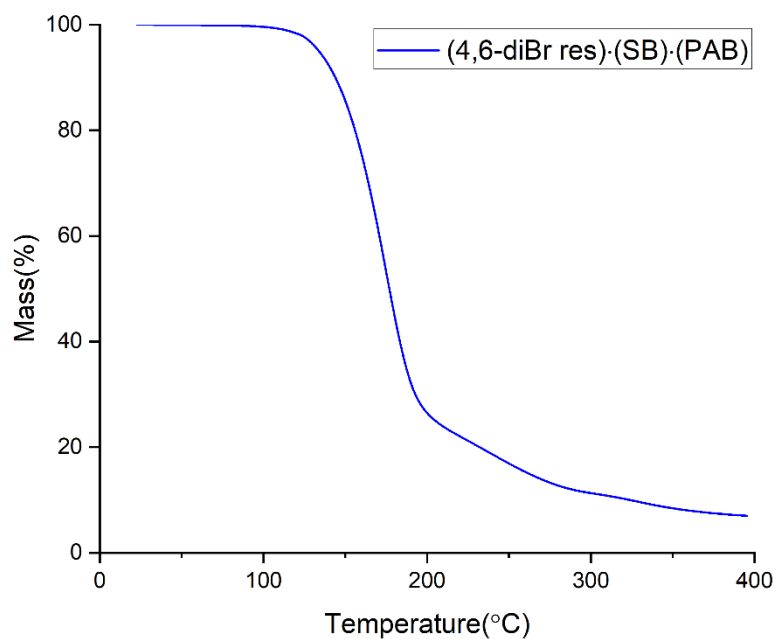

**Figure S10.** TGA curve of (4,6-diBr res)·(SB)·(PAB). Decomposition began at ca. 150 °C.

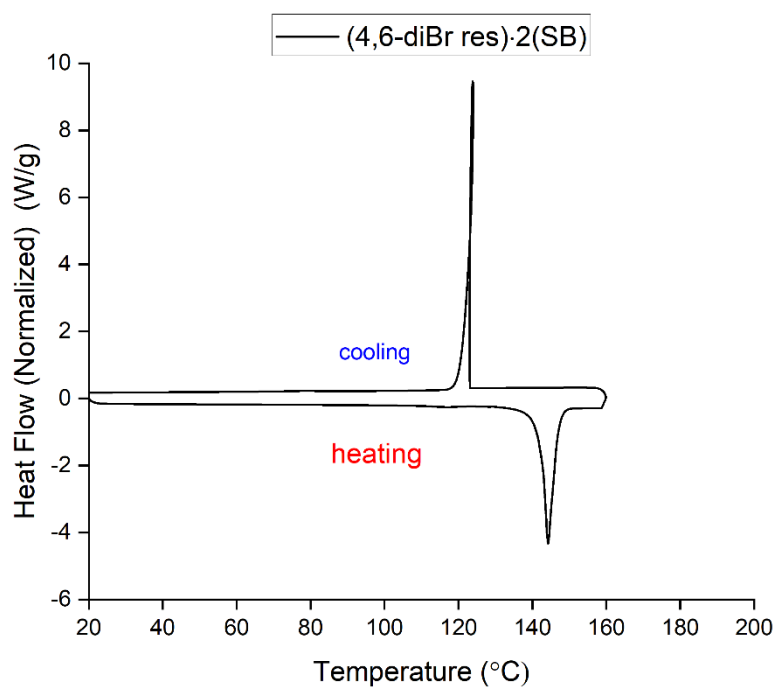

**Figure S11.** DSC thermogram of (4,6-diBr res)·2(SB) (onset: 142 °C, heating peak: 144 °C, cooling peak: 124 °C).

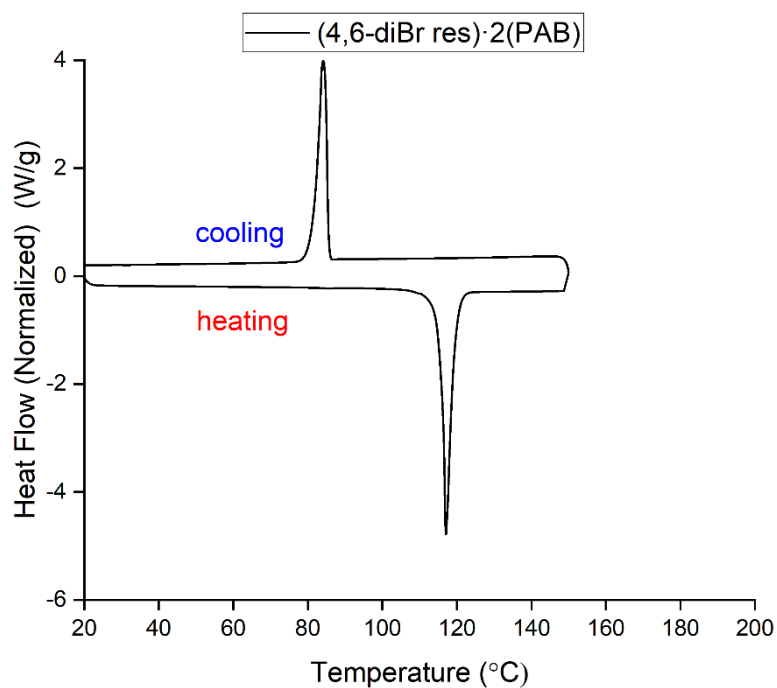

**Figure S12.** DSC thermogram of (4,6-diBr res)·2(PAB) (onset: 116 °C, heating peak: 117 °C, cooling peak: 84 °C).

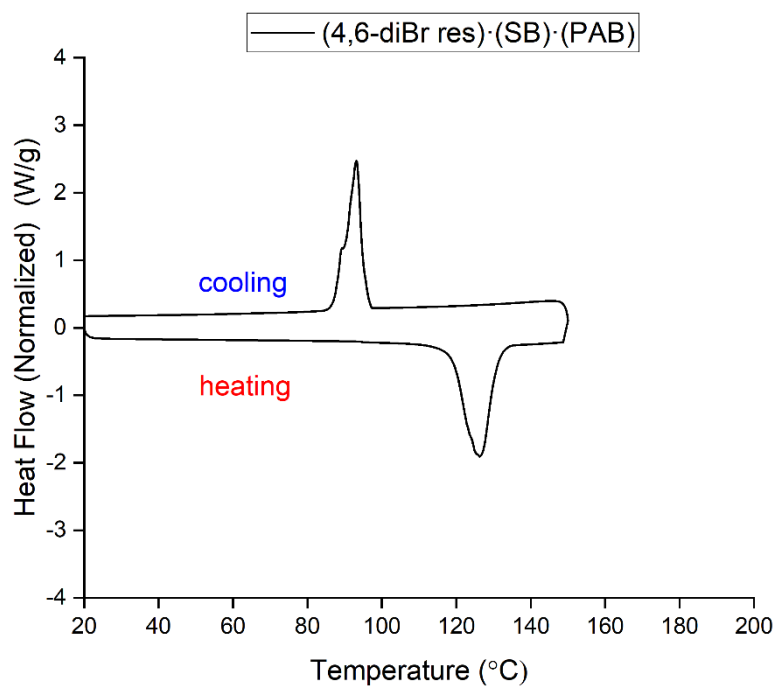

**Figure S13.** DSC thermogram of (4,6-diBr res)·(SB)·(PAB) (onset: 119 °C, heating peak: 126 °C, cooling peak: 93 °C).

**Table S7.** Melting point ranges of the solids determined by DSC.

| Cocrystal                 | Melting point (°C) |
|---------------------------|--------------------|
| (4,6-diBr res)·(2SB)      | 142-144            |
| (4,6-diBr res)·(2PAB)     | 116-117            |
| (4,6-diBr res)·(SB)·(PAB) | 119-126            |

## 6. Optical Images of the Cocrystals

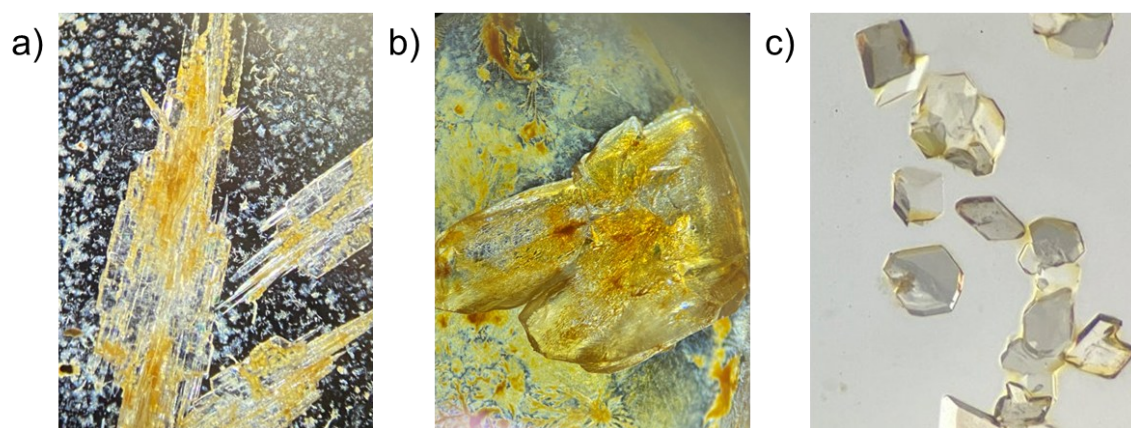

**Figure S14.** Optical images of crystals viewed under a stereoscope: a) (4,6-diBr res)·2(SB), b) (4,6-diBr res)·2(PAB), and c) (4,6-diBr res)·(SB)·(PAB).

## 7. Electrostatic Potential Energy Calculations

The Spartan'20 molecular modeling program with density functional theory at the B3LYP/6-311++G\*\* level<sup>8</sup> was used for the calculations. Each molecule was drawn and then locked in the conformation seen in the crystal structures before performing the structural optimization. The electrostatic potential energy surface was calculated for each molecule.

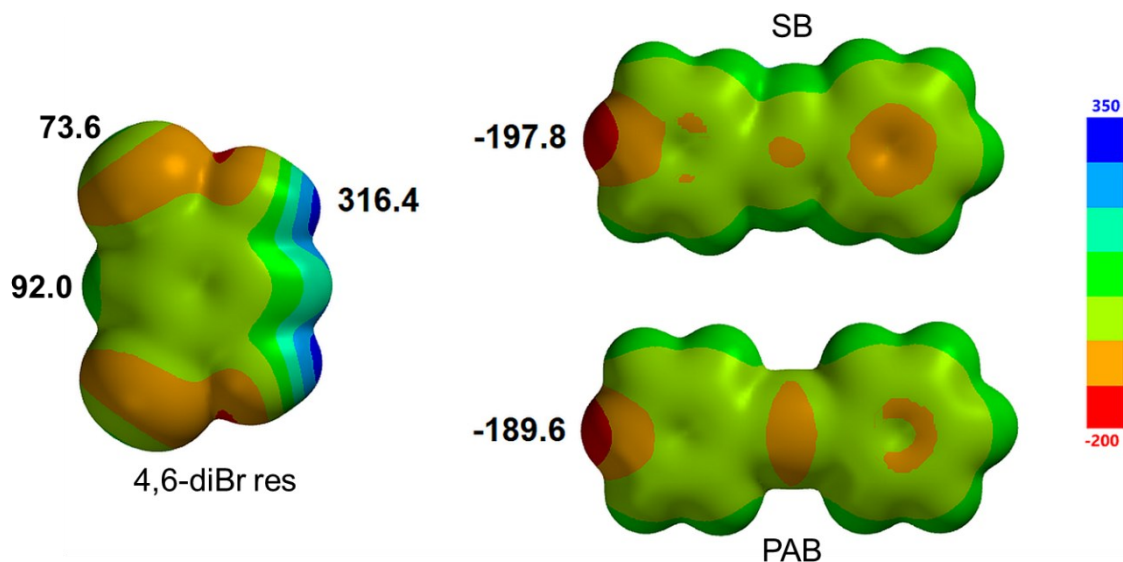

**Figure S15.** Molecular electrostatic potential energy surface for 4,6-diBr res, SB, and PAB. The unit for the scale is in kJ/mol.

## 8. Thermal Expansion Data and Intermolecular Interaction Distances

The TE coefficients were calculated using PASCAL.<sup>9</sup> The unit cell parameters from the crystallographic data sets collected from 290-190 K were used for the TE calculations (Table S1-S6).

**Table S8.** TE coefficients for the cocrystals. Errors are denoted in parentheses and approximate crystallographic axes are denoted in brackets.

| Cocrystal                     | $\alpha_{x_1}$ (MK <sup>-1</sup> )<br>[axis] | $\alpha_{x_2}$ (MK <sup>-1</sup> )<br>[axis] | $\alpha_{x_3}$ (MK <sup>-1</sup> )<br>[axis] | $\alpha_V$ (MK <sup>-1</sup> ) |
|-------------------------------|----------------------------------------------|----------------------------------------------|----------------------------------------------|--------------------------------|
| (4,6-diBr res)·2(SB)          | -20 (1)<br>[0 1 1]                           | 70 (1)<br>[-1 3 -3]                          | 145 (3)<br>[1 0 0]                           | 196 (5)                        |
| (4,6-diBr res)·2(PAB)         | -4 (1)<br>[4 0 -3]                           | 106 (1)<br>[0 1 0]                           | 120 (1)<br>[1 0 2]                           | 223 (1)                        |
| (4,6-diBr res)<br>·(SB)·(PAB) | -14 (1)<br>[0 1 1]                           | 76 (1)<br>[0 4 -3]                           | 130 (3)<br>[7 0 1]                           | 194 (3)                        |

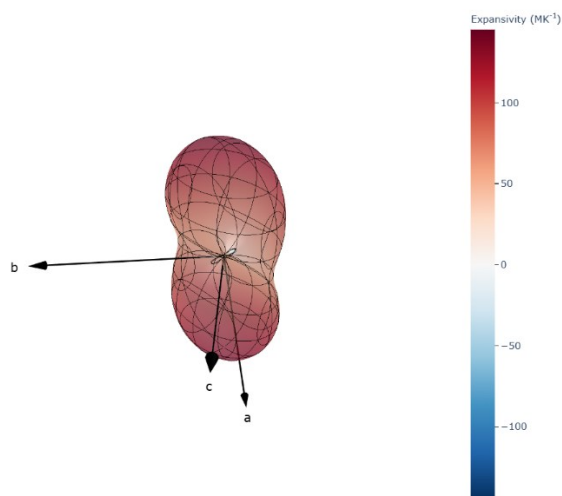

**Figure S16.** Thermal expansivity indicatrix for (4,6-diBr res)·2(SB).



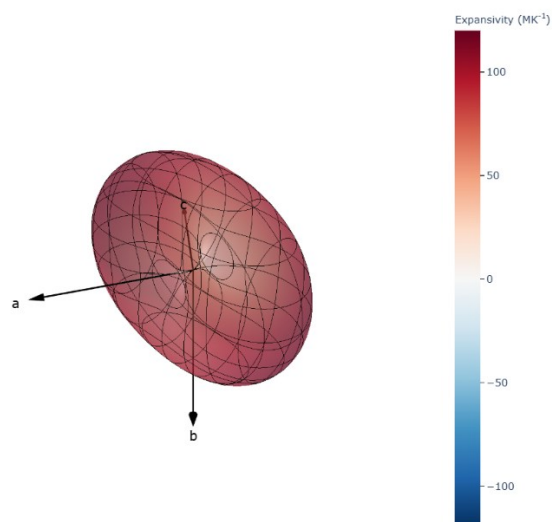

**Figure S17.** Thermal expansivity indicatrix for (4,6-diBr res)·2(PAB).

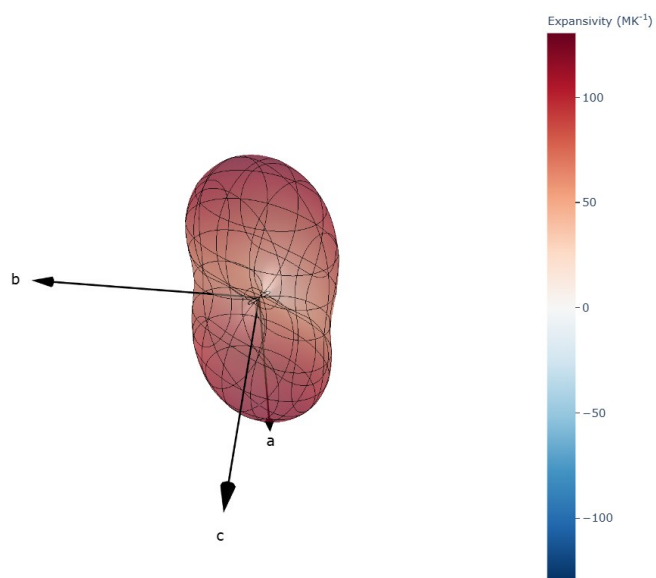

**Figure S18.** Thermal expansivity indicatrix for (4,6-diBr res)·(SB)·(PAB).

**Table S9.** Intermolecular interaction distances that contribute to the TE in the complexes.**X<sub>1</sub>:**

| Cocrystal                 | O-H...N (Å)<br>290 K | O-H...N (Å)<br>190 K | Δ (Å)  |
|---------------------------|----------------------|----------------------|--------|
| (4,6-diBr res)·2(SB)      | 2.690                | 2.687                | 0.003  |
|                           | 2.689                | 2.688                | 0.001  |
| (4,6-diBr res)·2(PAB)     | 2.749                | 2.750                | -0.001 |
|                           | 2.729                | 2.724                | 0.005  |
| (4,6-diBr res)·(SB)·(PAB) | 2.697                | 2.684                | 0.013  |
|                           | 2.699                | 2.691                | 0.008  |

| Cocrystal                 | ∠O-H...N (°)<br>290 K | ∠O-H...N (°)<br>190 K | Δ (°) |
|---------------------------|-----------------------|-----------------------|-------|
| (4,6-diBr res)·2(SB)      | 172.69                | 172.96                | -0.27 |
|                           | 176.29                | 177.59                | -1.30 |
| (4,6-diBr res)·2(PAB)     | 170.45                | 170.55                | -0.10 |
|                           | 170.98                | 170.99                | -0.01 |
| (4,6-diBr res)·(SB)·(PAB) | 172.88                | 172.88                | 0.00  |
|                           | 173.10                | 177.57                | -4.47 |

**X<sub>2</sub>:**

| Cocrystal                 | C-H...Br (Å)<br>290 K | C-H...Br (Å)<br>190 K | Δ (Å)      |
|---------------------------|-----------------------|-----------------------|------------|
| (4,6-diBr res)·2(SB)      | 3.946                 | 3.911                 | 0.035      |
|                           | 3.701                 | 3.650                 | 0.051      |
|                           | 3.823                 | 3.798                 | 0.025      |
|                           |                       |                       | Avg: 0.037 |
| (4,6-diBr res)·2(PAB)     | 3.949                 | 3.928                 | 0.021      |
|                           | 3.838                 | 3.787                 | 0.051      |
|                           | 4.200                 | 4.161                 | 0.039      |
|                           | 3.872                 | 3.827                 | 0.045      |
|                           |                       |                       | Avg: 0.039 |
| (4,6-diBr res)·(SB)·(PAB) | 3.813                 | 3.782                 | 0.031      |
|                           | 3.744                 | 3.713                 | 0.031      |
|                           | 3.706                 | 3.654                 | 0.052      |
|                           |                       |                       | Avg: 0.038 |

| Cocrystal                 | C-H...O (Å)<br>290 K | C-H...O (Å)<br>190 K | Δ (Å) |
|---------------------------|----------------------|----------------------|-------|
| (4,6-diBr res)·2(SB)      | 3.752                | 3.740                | 0.012 |
| (4,6-diBr res)·2(PAB)     | 3.489                | 3.442                | 0.047 |
| (4,6-diBr res)·(SB)·(PAB) | 3.694                | 3.669                | 0.025 |

| Cocrystal                 | C-H... $\pi$ (Å)<br>290 K | C-H... $\pi$ (Å)<br>190 K | $\Delta$ (Å)   |
|---------------------------|---------------------------|---------------------------|----------------|
| (4,6-diBr res)·2(SB)      | 3.683                     | 3.636                     | 0.047          |
| (4,6-diBr res)·2(PAB)     | -                         | -                         | -              |
| (4,6-diBr res)·(SB)·(PAB) | 3.654<br>3.681            | 3.614<br>3.638            | 0.040<br>0.043 |

| Cocrystal                 | C-H... $\pi$ /C<br>contacts (Å)<br>290 K | C-H... $\pi$ /C<br>contacts (Å)<br>190 K | $\Delta$ (Å) |
|---------------------------|------------------------------------------|------------------------------------------|--------------|
| (4,6-diBr res)·2(SB)      | -                                        | -                                        | -            |
| (4,6-diBr res)·2(PAB)     | 3.513                                    | 3.452                                    | 0.061        |
|                           | 3.426                                    | 3.374                                    | 0.052        |
|                           | 3.545                                    | 3.510                                    | 0.035        |
|                           | 4.142                                    | 4.103                                    | 0.039        |
|                           |                                          |                                          | Avg: 0.047   |
| (4,6-diBr res)·(SB)·(PAB) | -                                        | -                                        | -            |

**X<sub>3</sub>:**

| Cocrystal                 | $\pi$ ... $\pi$ (Å)<br>290 K | $\pi$ ... $\pi$ (Å)<br>190 K | $\Delta$ (Å) |
|---------------------------|------------------------------|------------------------------|--------------|
| (4,6-diBr res)·2(SB)      | 3.875                        | 3.841                        | 0.034        |
|                           | 4.285                        | 4.243                        | 0.042        |
|                           | 4.244                        | 4.190                        | 0.054        |
| (4,6-diBr res)·2(PAB)     | -                            | -                            | -            |
| (4,6-diBr res)·(SB)·(PAB) | 3.868                        | 3.828                        | 0.040        |
|                           | 4.312                        | 4.282                        | 0.030        |
|                           | 4.215                        | 4.165                        | 0.050        |

| Cocrystal                 | C-H...O (Å)<br>290 K | C-H...O (Å)<br>190 K | $\Delta$ (Å) |
|---------------------------|----------------------|----------------------|--------------|
| (4,6-diBr res)·2(SB)      | 3.312                | 3.252                | 0.060        |
| (4,6-diBr res)·2(PAB)     | 3.361                | 3.304                | 0.057        |
| (4,6-diBr res)·(SB)·(PAB) | 3.306                | 3.226                | 0.080        |

| Cocrystal                 | Br... $\pi$ (Å)<br>290 K | Br... $\pi$ (Å)<br>190 K | $\Delta$ (Å) |
|---------------------------|--------------------------|--------------------------|--------------|
| (4,6-diBr res)·2(SB)      | 3.474                    | 3.416                    | 0.058        |
|                           | 3.573                    | 3.497                    | 0.076        |
| (4,6-diBr res)·2(PAB)     | -                        | -                        | -            |
| (4,6-diBr res)·(SB)·(PAB) | 3.511                    | 3.434                    | 0.077        |
|                           | 3.595                    | 3.522                    | 0.073        |

|                                |       |       |              |
|--------------------------------|-------|-------|--------------|
| (4,6-diBr res)·2(PAB)          | 290 K | 190 K | $\Delta$ (Å) |
| Br...Br (Å)                    | 3.838 | 3.807 | 0.031        |
| Stacking centroid-centroid (Å) | 5.631 | 5.589 | 0.042        |
|                                | 4.612 | 4.664 | -0.052       |
|                                | 6.257 | 6.256 | 0.001        |
| C-H... $\pi$ (Å)               | 3.838 | 3.807 | 0.031        |
|                                | 3.882 | 3.838 | 0.044        |
|                                |       |       |              |

**Table S10.** Major and minor site occupancies of SB at each temperature for both (4,6-diBr res)·2(SB) and (4,6-diBr res)·(SB)·(PAB).

| Temperature | (4,6-diBr res)·2(SB) | (4,6-diBr res)·(SB)·(PAB) |
|-------------|----------------------|---------------------------|
| 290 K       | 0.95/0.05            | 0.60/0.40<br>0.67/0.33    |
| 270 K       | 0.96/0.04            | 0.60/0.40<br>0.66/0.34    |
| 250 K       | 0.98/0.02            | 0.60/0.40<br>0.65/0.35    |
| 230 K       | -                    | 0.63/0.37<br>0.66/0.34    |
| 210 K       | -                    | 0.63/0.37<br>0.64/0.36    |
| 190 K       | -                    | 0.64/0.36<br>0.67/0.33    |

## 9. Additional Crystal Structure Images

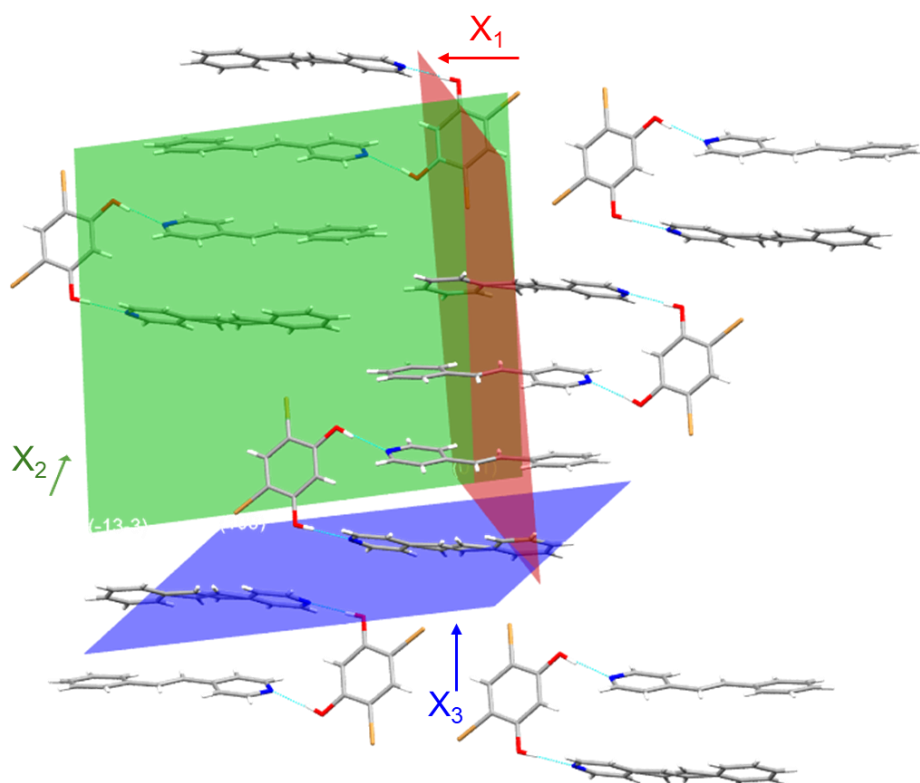

**Figure S19.** Principal axes of TE for (4,6-diBr res)·2(SB).

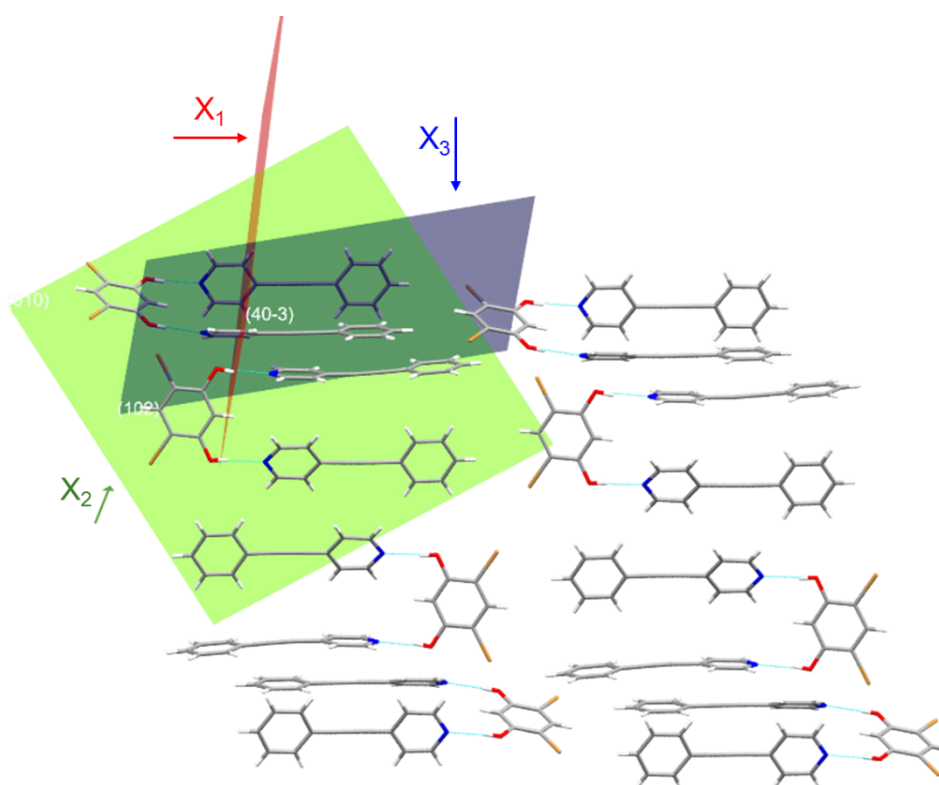

**Figure S20.** Principal axes of TE for (4,6-diBr res)·2(PAB).

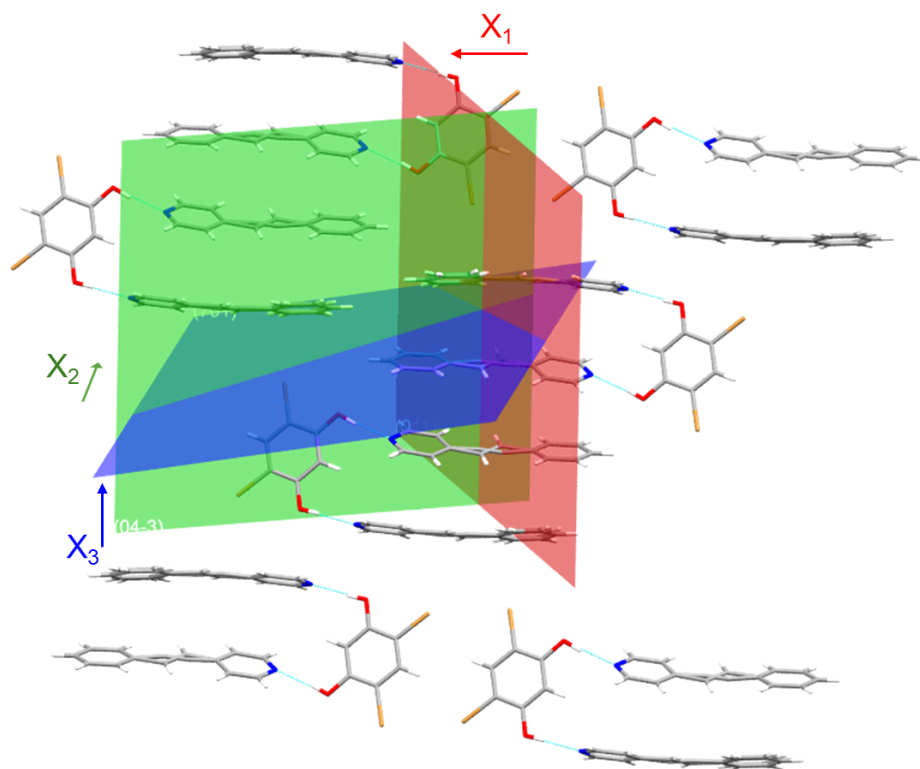

**Figure S21.** Principal axes of TE for (4,6-diBr res)·(SB)·(PAB).

## 10. Variation of the Unit Cell Parameters with Temperature

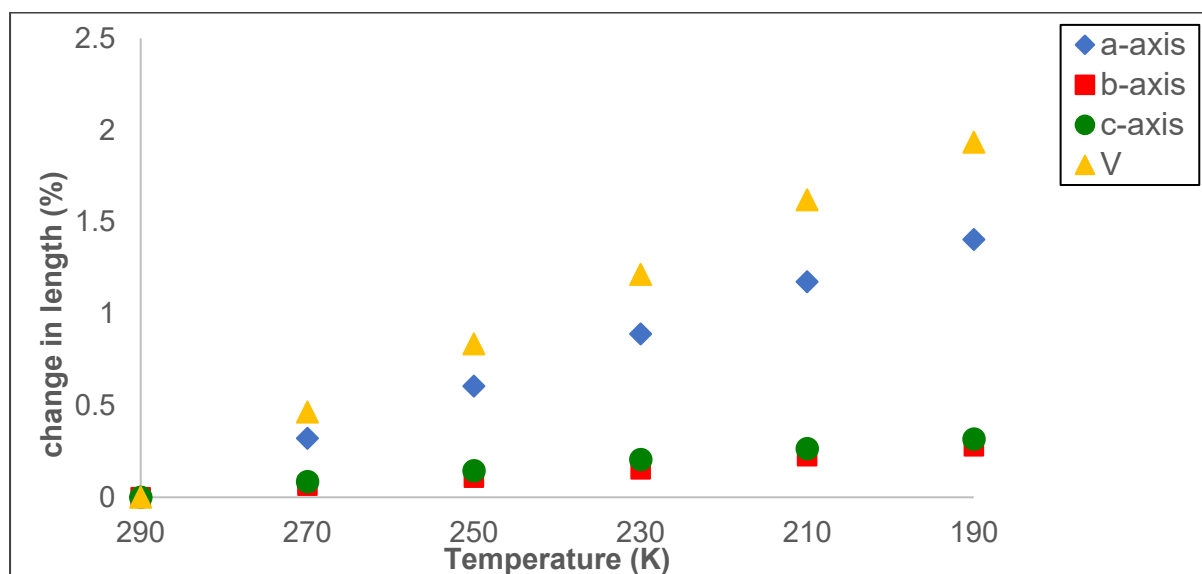

**Figure S22.** Percent change in length as a function of temperature for (4,6-diBr res)·2(SB).

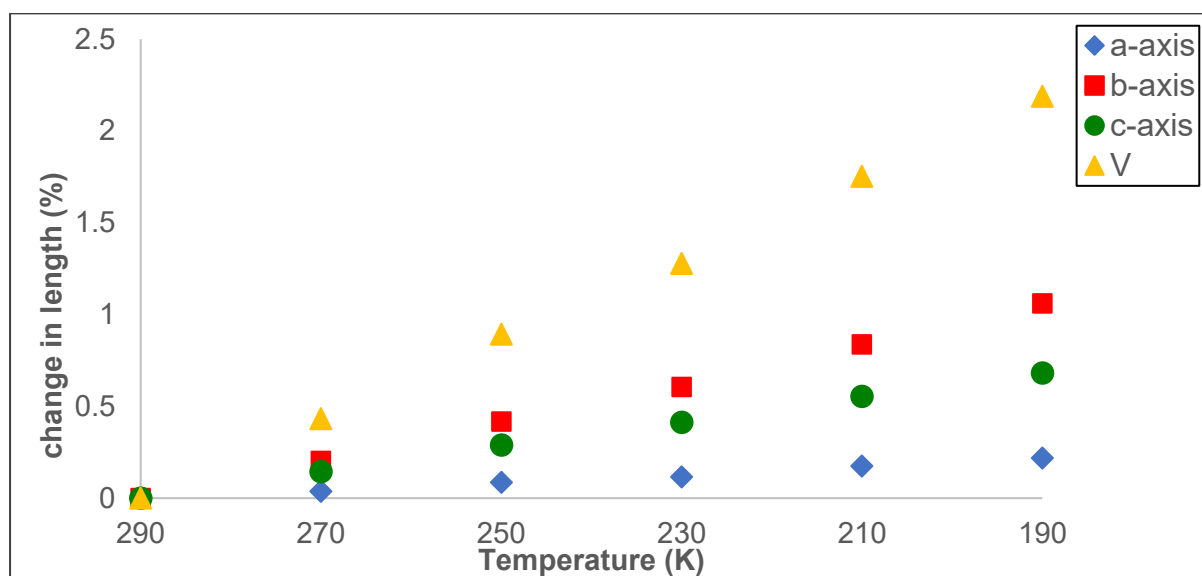

**Figure S23.** Percent change in length as a function of temperature for (4,6-diBr res)·2(PAB).

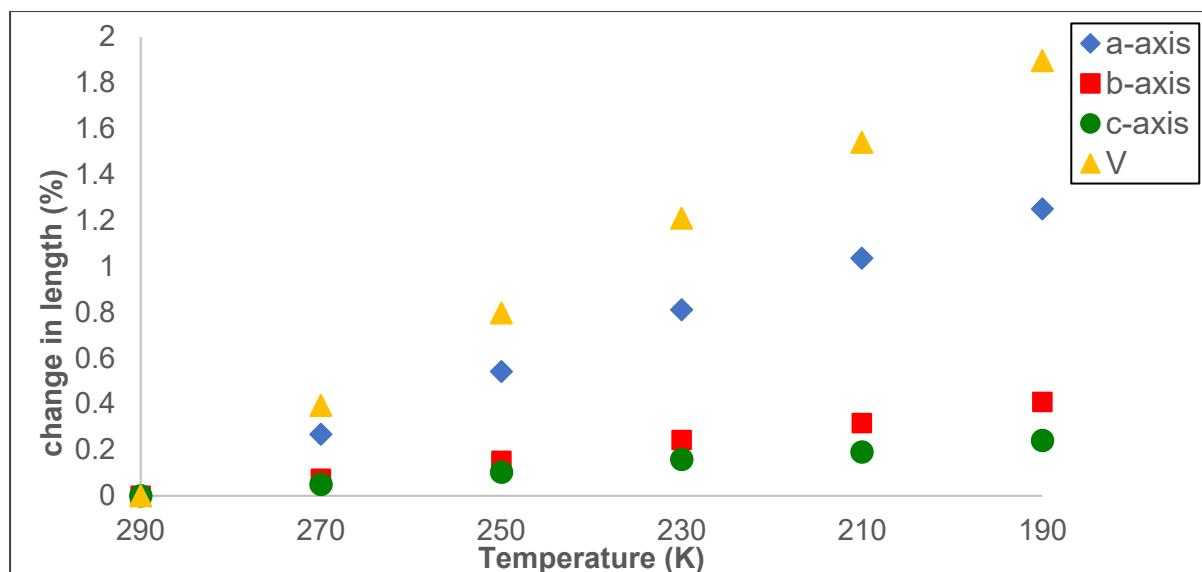

**Figure S24.** Percent change in length as a function of temperature for (4,6-diBr res)·(SB)·(PAB).

## 11. References

1. Jin, K.; Yue, B.; Yan, L.; Qiao, R.; Zhao, H.; Zhang, J. Synthesis and Characterization of Poly (5'-hexyloxy-1',4-biphenyl)-b-poly (2',4'-bispropoxysulfonate-1', 4-biphenyl) with High Ion Exchange Capacity for Proton Exchange Membrane Fuel Cell Applications. *Chem. Asian J.* **2022**, *17*, e202200109.
2. George III, G. C.; Unruh, D. K.; Groeneman, R. H.; Hutchins, K. M. Molecular Motion and Ligand Stacking Influence Thermal Expansion Behavior and Argentophilic Forces in Silver Coordination Complexes. *Cryst. Growth Des.* **2022**, *22*, 4538-4545.
3. Hutchins, K. M.; Rupasinghe, T. P.; Ditzler, L. R.; Swenson, D. C.; Sander, J. R.; Baltrusaitis, J.; Tivanski, A. V.; MacGillivray, L. R. Nanocrystals of a metal-organic complex exhibit remarkably high conductivity that increases in a single-crystal-to-single-crystal transformation. *J. Am. Chem. Soc.* **2014**, *136*, 6778-6781.
4. Bruker. APEX5, SAINT and SADABS. 2021 Bruker AXS Inc., Madison, Wisconsin, USA.
5. Sheldrick, G. M. SHELXT - Integrated space-group and crystal-structure determination. *Acta Crystallogr., Sect. A: Found. Adv.* **2015**, *A71*, 3-8.
6. Sheldrick, G. M. Crystal structure refinement with SHELXL. *Acta Crystallogr., Sect. C: Struct. Chem.* **2015**, *C71*, 3-8.
7. Dolomanov, O. V.; Bourhis, L. J.; Gildea, R. J.; Howard, J. A. K.; Puschmann, H. OLEX2: a complete structure solution, refinement and analysis program. *J. Appl. Cryst.* **2009**, *42*, 339-341.
8. *Spartan'20, Version 1.0.1*; Wavefunction, Inc.: Irvine, CA, USA, 2020.
9. Cliffe, M. J.; Goodwin, A. L. PASCAL: a principal axis strain calculator for thermal expansion and compressibility determination. *J. Appl. Cryst.* **2012**, *45*, 1321-1329.
